# Supplementary material for: Gut-brain axis metabolic pathway regulates antidepressant efficacy of albiflorin
Source: PubMed Central journal article supplement — Theranostics. 2018 Nov 13;8(21):5945–59. doi: 10.7150/thno.28068 (PMC6299426; doi:10.7150/thno.28068), 2018-11-13

# Gut-brain axis metabolic pathway regulates antidepressant efficacy of Albiflorin

Zhen-Xiong Zhao<sup>1,†</sup>, Jie Fu<sup>1,†</sup>, Shu-Rong Ma<sup>1,†</sup>, Ran Peng<sup>1</sup>, Jin-Bo Yu<sup>1</sup>, Lin Cong<sup>1</sup>,  
Li-Bin Pan<sup>1</sup>, Zuo-Guang Zhang<sup>2</sup>, Hui Tian<sup>2</sup>, Chun-Tao Che<sup>3</sup>, Yan Wang<sup>1,\*</sup>, Jian-Dong  
Jiang<sup>1,\*</sup>

1. State Key Laboratory of Bioactive Substance and Function of Natural Medicines, Institute of Materia Medica, Chinese Academy of Medical Sciences / Peking Union Medical College, Beijing 100050, China
2. Beijing WONNER Biotech. Co. Ltd, Beijing 100071, China
3. College of Pharmacy, The University of Illinois at Chicago, Chicago 60607, United States

† These authors made an equal contribution to this work.

\*Corresponding authors: Dr. Yan Wang, Tel.: +86 10 63165238; fax, +86 10 63165238, e-mail address: wangyan@imm.ac.cn; or Dr. Jian-Dong Jiang, Tel.: +86 1083160005; fax, +86 10 63017757, e-mail address: jiang.jdong@163.com

## **Supplemental Figures**

**Figure S1. Identification of the possible metabolites of albiflorin in gut microbiota by LC/MS<sup>n</sup>-IT-TOF.** The two possible metabolites of albiflorin were identified as Alb-M1 and Alb-M2 by multistage mass spectrometry results.

**Figure S2. The typical chromatograms of albiflorin and its metabolites in the gut microbiota.**

**Figure S1**

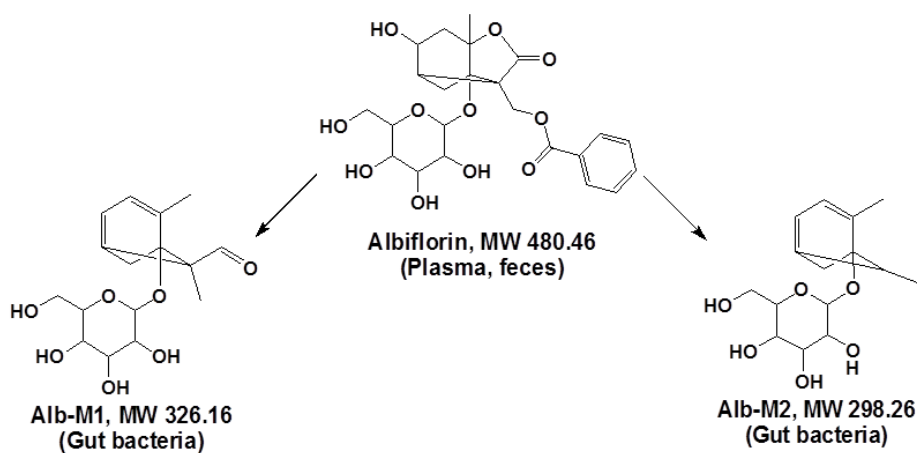

Multistage mass spectrometry results of albiflorin metabolites in gut bacteria

|        | ESI | MS <sup>1</sup> m/z         | Fragments<br>MS <sup>2</sup> m/z |
|--------|-----|-----------------------------|----------------------------------|
| Alb-M1 | +   | 327.1028 [M+H] <sup>+</sup> | 205.0938                         |
| Alb-M2 | +   | 299.2635 [M+H] <sup>+</sup> | 263.2375<br>185.1589             |

**Figure S2**

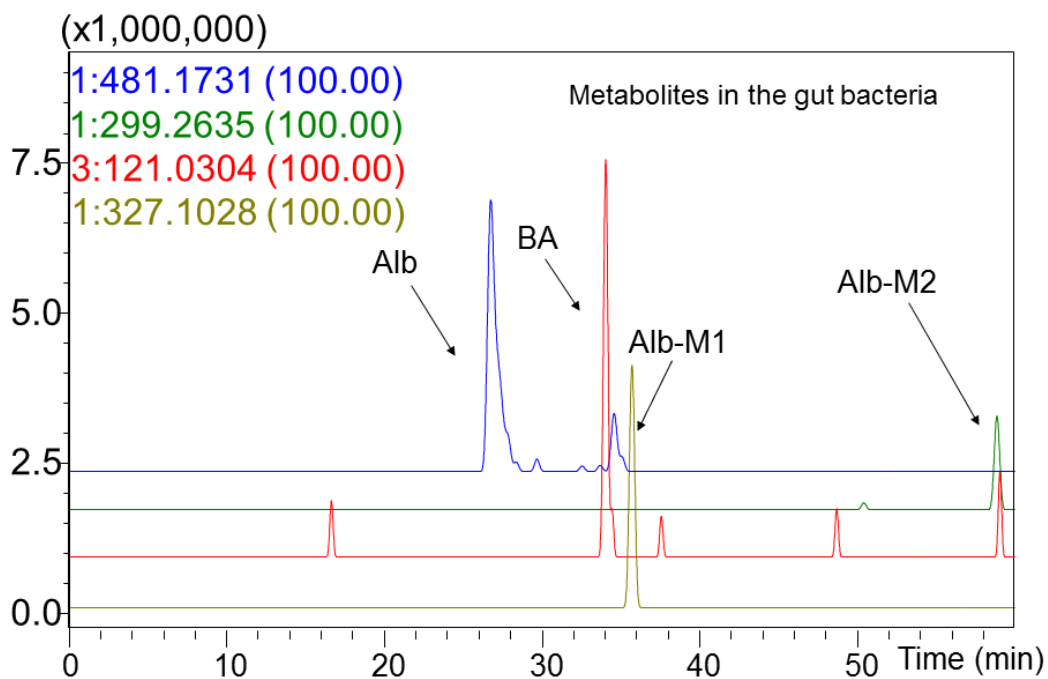

Supplement: thnov08p5945s1.pdf [file thnov08p5945s1.pdf]
